# Supplementary material for: Typhoid in Laos: An 18-Year Perspective
Source: PubMed Central journal article supplement (PMC7124924; doi:10.4269/ajtmh.19-0637), 2020-01-27
Supplement: tpmd190637.SD1.pdf [file tpmd190637.SD1.pdf]

**Supplementary material**

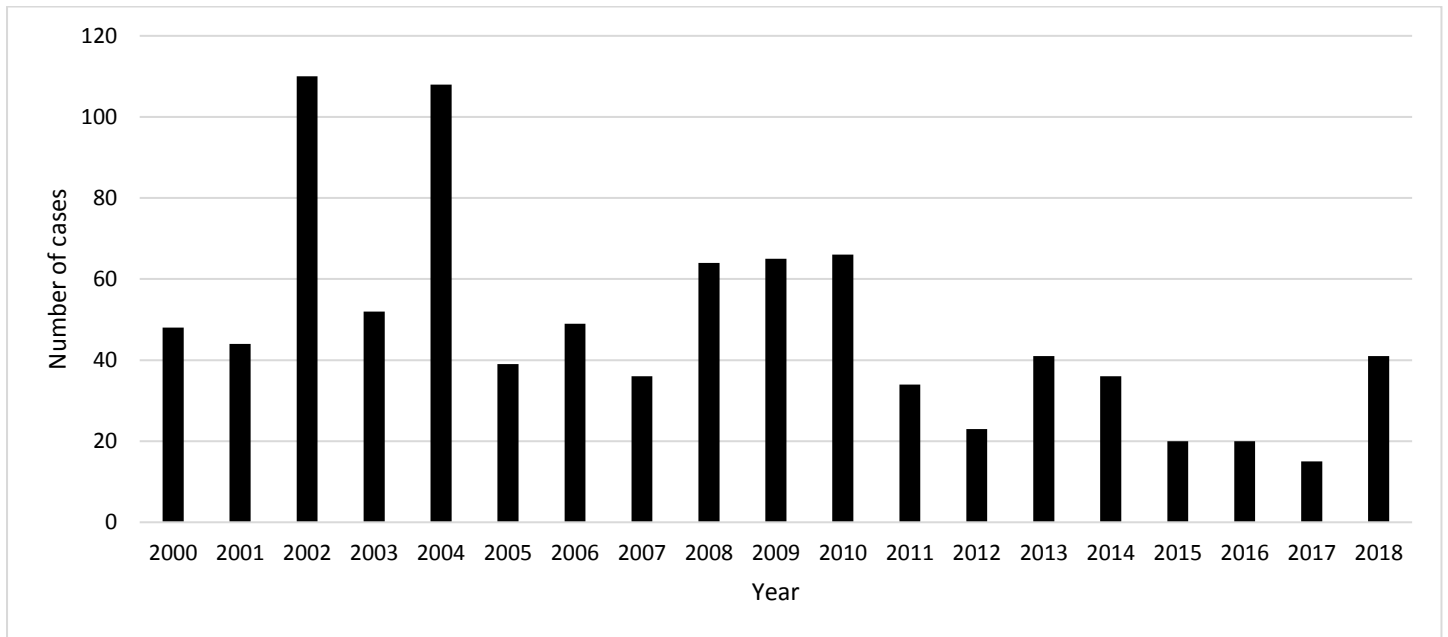

Supplementary Figure 1. Total number of inpatients recorded with *S. Typhi* blood stream infections per year

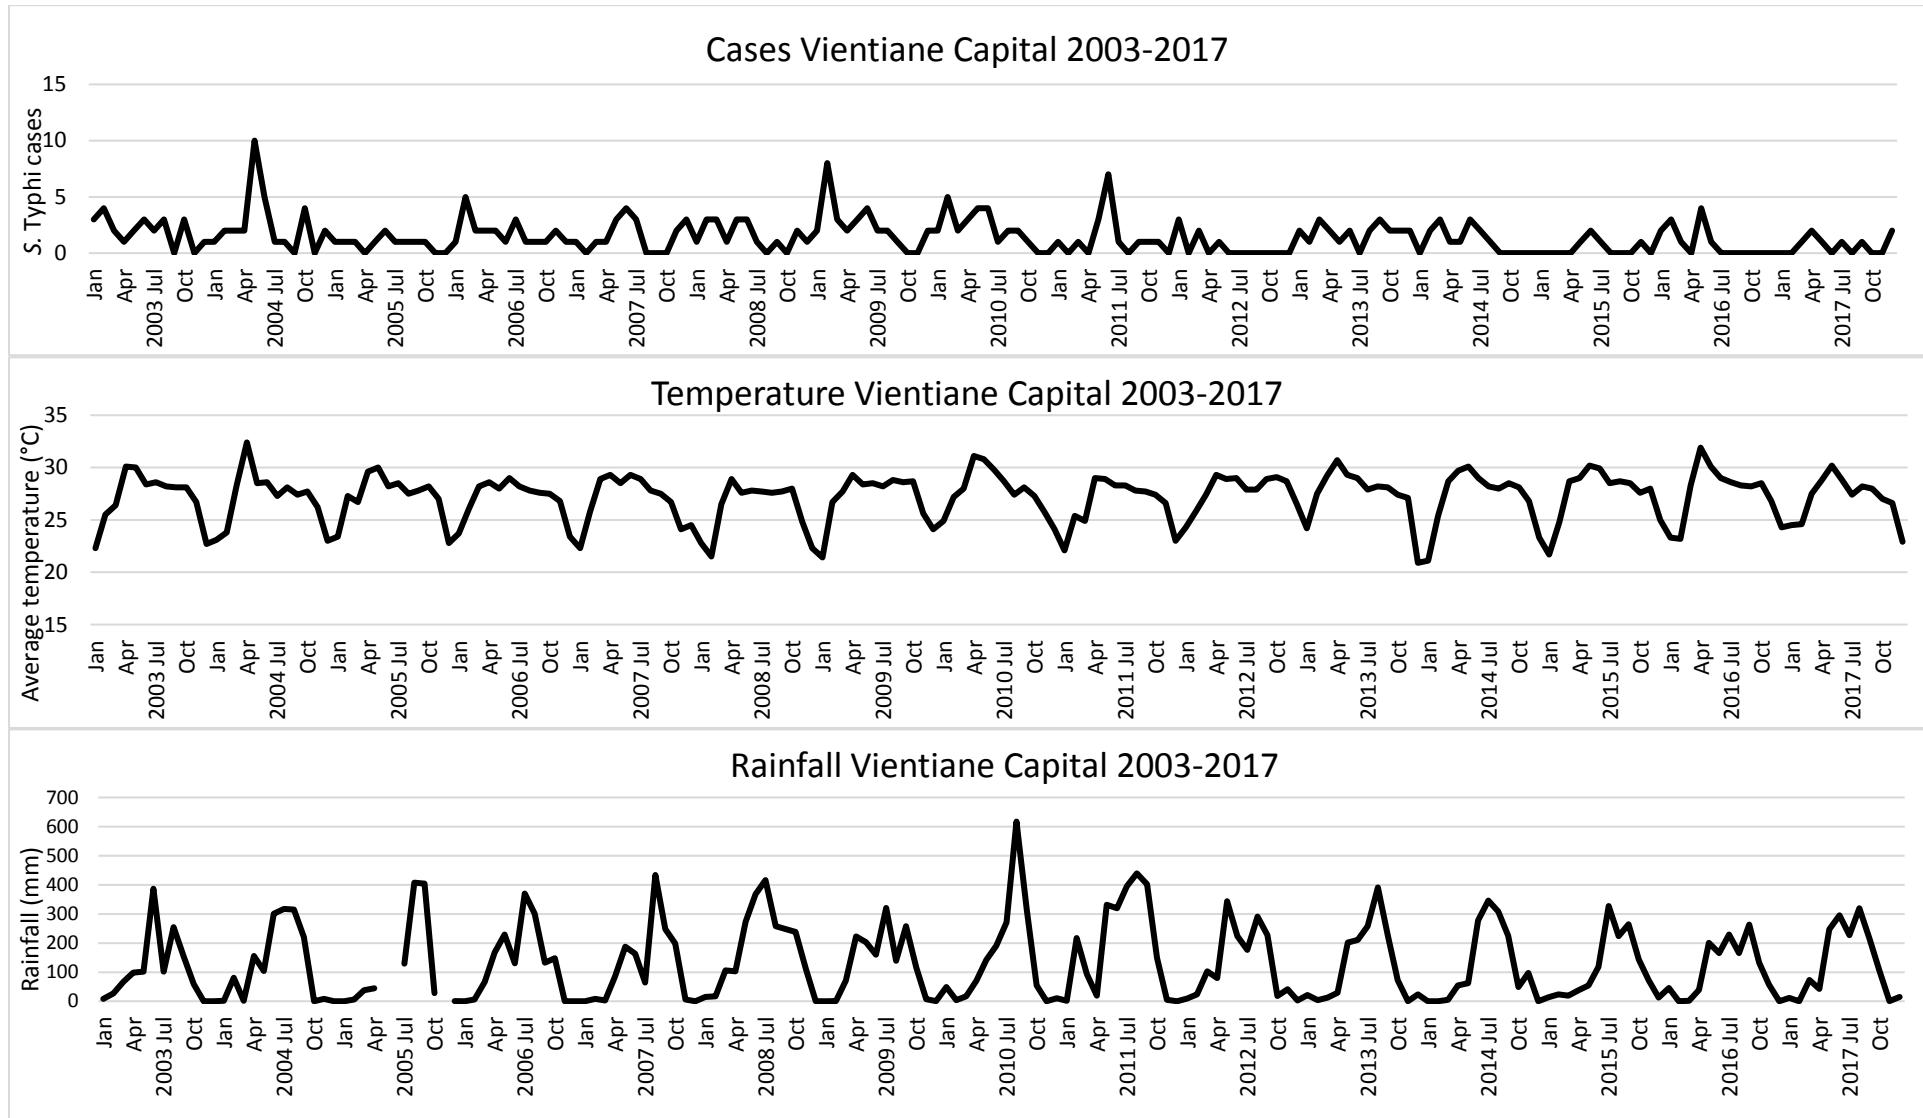

Supplementary Figure 2. Number of inpatients recorded with *S. Typhi* per month, mean temperature and mean rainfall for Vientiane Capital

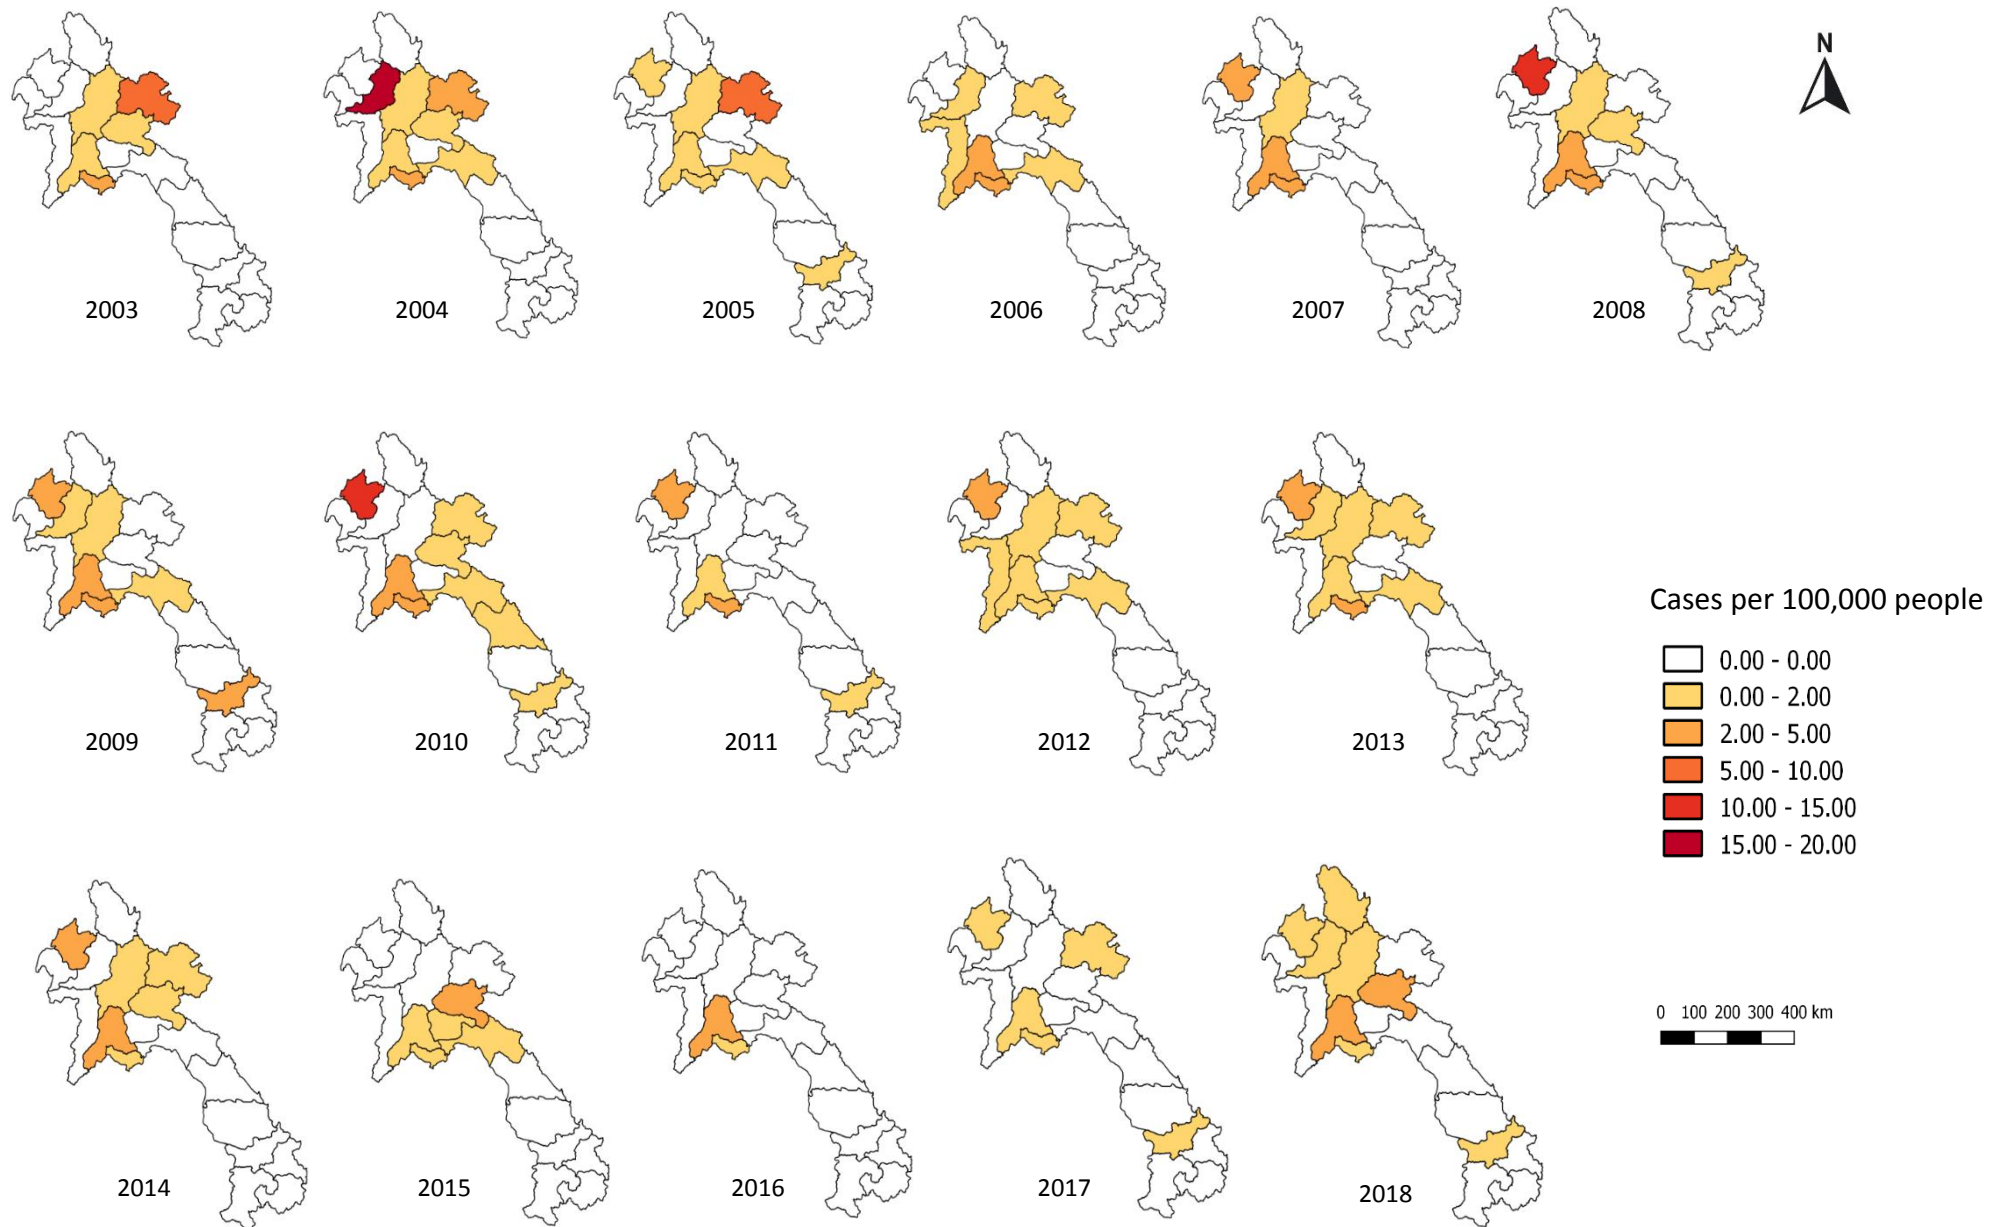

Supplementary Figure 3. *S. Typhi* cases diagnosed in hospital per 100,000 people in the community by home province by year

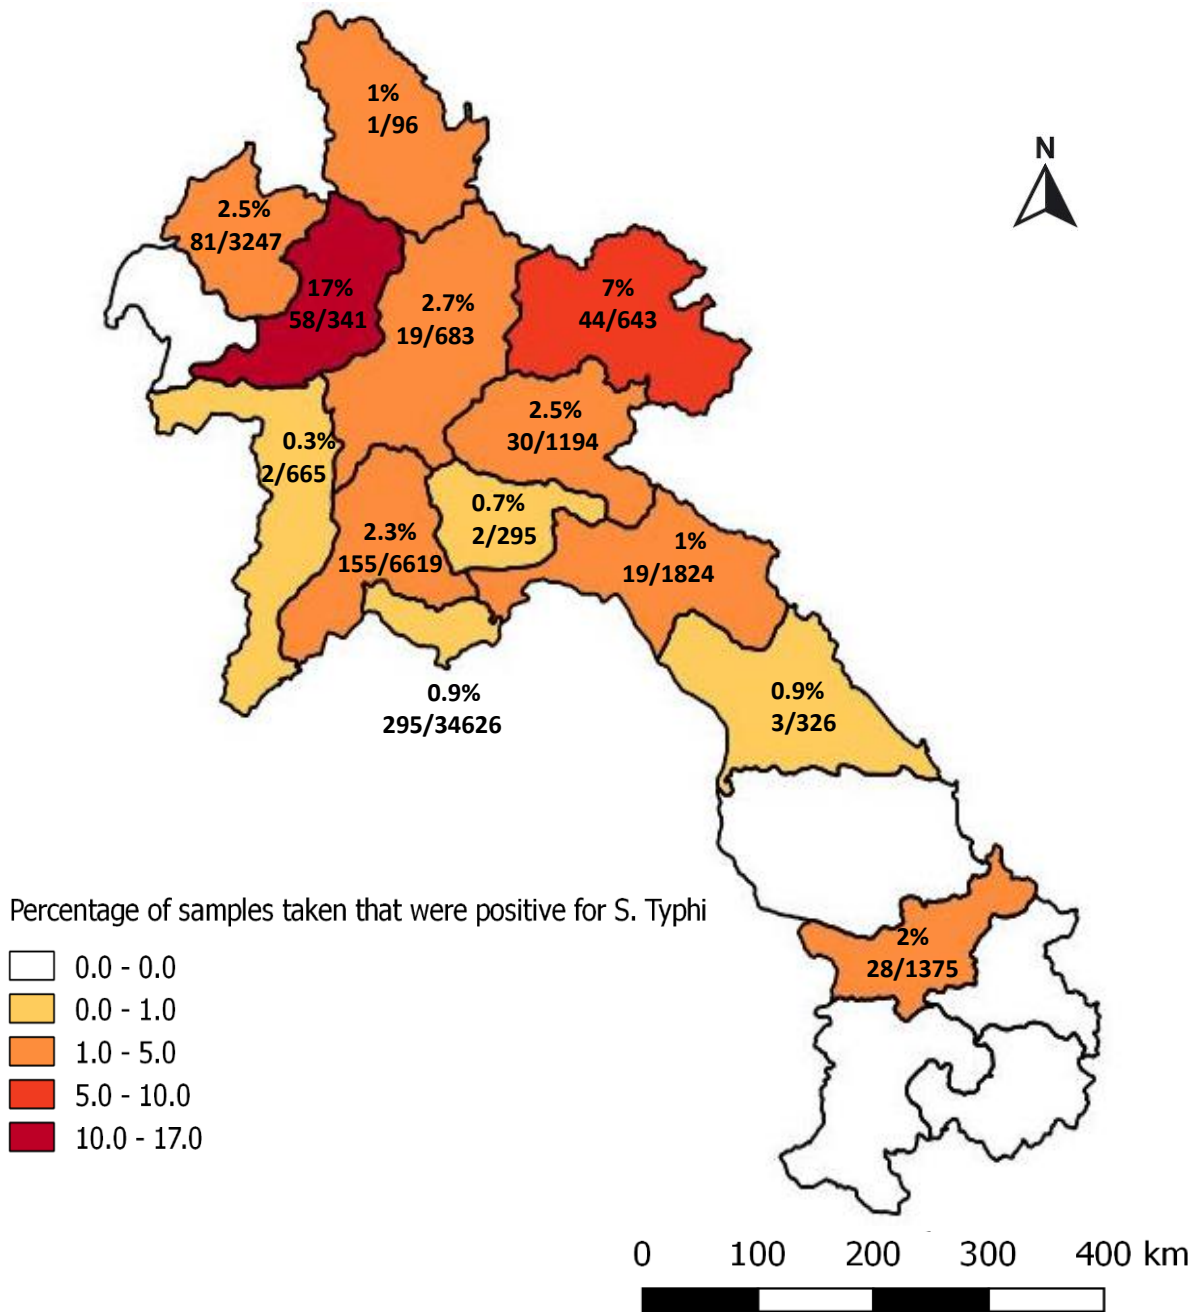

Supplementary Figure 4. Percentage of all samples taken that were positive for *S. Typhi* per province between 2000- 2018. Highest percent of positive cases came from Oudomxay Province which reflects the 2002 outbreak

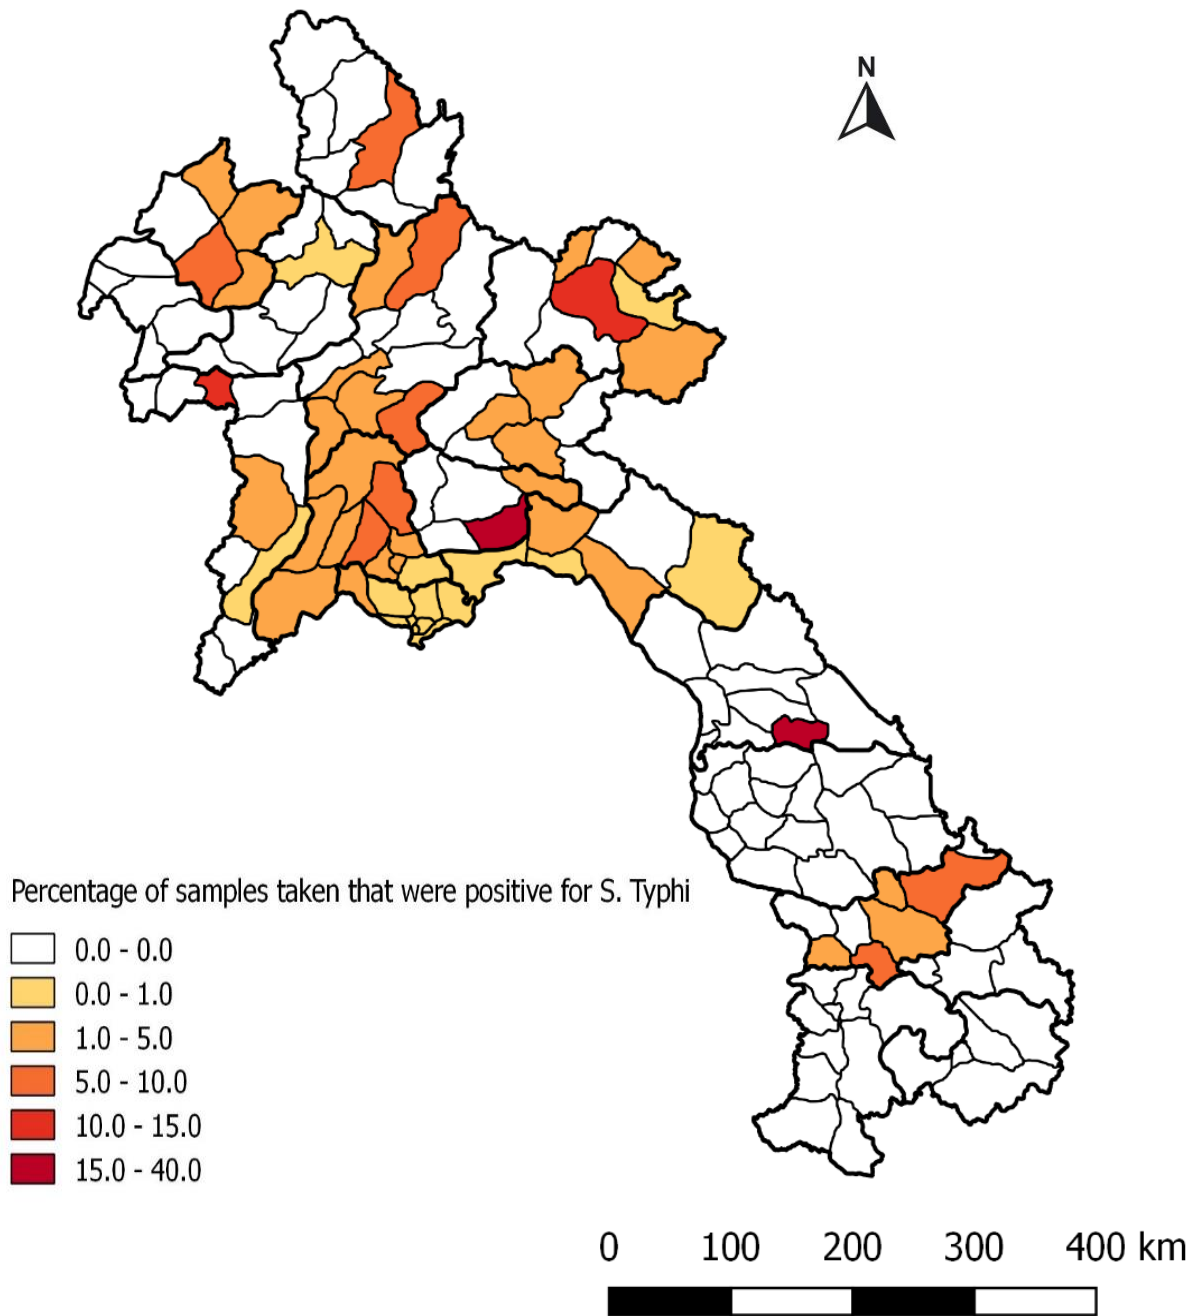

Supplementary Figure 5. Percentage of all blood culture samples taken that were positive for *S. Typhi* per community home district population between 2000- 2018.
